# Supplementary material for: Blunting of Colon Contractions in Diabetics with Gastroparesis Quantified by Wireless Motility Capsule Methods
Source: PubMed Central journal article supplement (PMC4624915; doi:10.1371/journal.pone.0141183), 2015-10-28
Supplement: pone.0141183.s002.pdf [file pone.0141183.s002.pdf]

| ID               | Group | Sex | Age | BMI | Glucose | Insulin | Oral hypo | Antidep | TCAtetra | NERI | Opiate | GRT | Capped GI | CTT | >25 mmHg |       |       |       |       | Lastnum | Allnum |      |
|------------------|-------|-----|-----|-----|---------|---------|-----------|---------|----------|------|--------|-----|-----------|-----|----------|-------|-------|-------|-------|---------|--------|------|
|                  |       |     |     |     |         |         |           |         |          |      |        |     |           |     | Q1num    | Q2num | Q3num | Q4num | Q5num |         |        |      |
| 1005 HV          | m     | f   | 55  | 24  |         |         |           |         |          |      |        |     | 195       | 195 | 71       | 3.38  | 5.92  | 1.71  | 17.75 | 20      | 28.76  |      |
| 1009 HV          | f     | f   | 30  | 20  |         |         |           |         |          |      |        |     | -5        | -5  | 2197     | 2.21  | 14.58 | 9.75  | 12.18 | 4       | 38.72  |      |
| 1014 HV          | m     | m   | 25  | 23  |         |         |           |         |          |      |        |     | 218       | 218 | 673      | 12.12 | 0.8   | 5.53  | 15.69 | 27      | 34.14  |      |
| 1015 HV          | f     | f   | 22  | 22  |         |         |           |         |          |      |        |     | 256       | 256 | 1655     | 3.26  | 0.91  | 5.29  | 14.9  | 16      | 24.36  |      |
| 1016 HV          | f     | f   | 21  | 22  |         |         |           |         |          |      |        |     | 301       | 301 | 2417     | 8.04  | 14.75 | 21.99 | 8.66  | 10      | 53.44  |      |
| 1017 HV          | m     | m   | 20  | 24  |         |         |           |         |          |      |        |     | 122       | 122 | 308      | 3.12  | 7.79  | 7.79  | 11.3  | 8       | 30     |      |
| 1018 HV          | m     | m   | 27  | 22  |         |         |           |         |          |      |        |     | 208       | 208 | 207      | 0     | 2.32  | 4.06  | 13.62 | 15      | 20     |      |
| 1020 HV          | m     | m   | 34  | 29  |         |         |           |         |          |      |        |     | 199       | 199 | 1273     | 0.42  | 3.82  | 9.62  | 4.34  | 12      | 18.2   |      |
| 1022 HV          | f     | f   | 23  | 27  |         |         |           |         |          |      |        |     | 211       | 211 | 2593     | 1.57  | 4.88  | 10.44 | 2.59  | 15      | 19.48  |      |
| 2006 HV          | m     | m   | 26  | 22  |         |         |           |         |          |      |        |     | 279       | 279 | 949      | 1.01  | 0.32  | 0.44  | 6.89  | 25      | 8.66   |      |
| 2007 HV          | f     | f   | 46  | 28  |         |         |           |         |          |      |        |     | 229       | 229 | 1145     | 10.27 | 0.89  | 8.7   | 6.92  | 9       | 26.78  |      |
| 2011 HV          | m     | m   | 38  | 27  |         |         |           |         |          |      |        |     | 304       | 304 | 766      | 2.58  | 1.17  | 3.99  | 8.15  | 17      | 15.89  |      |
| 2012 HV          | f     | f   | 49  | 28  |         |         |           |         |          |      |        |     | 145       | 145 | 137      | 10.95 | 7.88  | 2.63  | 5.69  | 4       | 27.15  |      |
| 2015 HV          | f     | f   | 22  | 23  |         |         |           |         |          |      |        |     | 213       | 213 | 2338     | 11.78 | 5.9   | 6.42  | 5.93  | 28      | 30.03  |      |
| 2016 HV          | f     | f   | 34  | 22  |         |         |           |         |          |      |        |     | 175       | 175 | 1482     | 4.9   | 1.21  | 2.02  | 9.19  | 14      | 17.32  |      |
| 2018 HV          | m     | m   | 20  | 23  |         |         |           |         |          |      |        |     | 195       | 195 | 813      | 6.57  | 0.3   | 0     | 2.14  | 25      | 9.01   |      |
| 3003 HV          | m     | m   | 22  | 29  |         |         |           |         |          |      |        |     | 166       | 166 | 1438     | 32.75 | 55.62 | 2.84  | 11.02 | 11      | 102.23 |      |
| 3004 HV          | m     | m   | 22  | 29  |         |         |           |         |          |      |        |     | 1         | 1   | 638      | 5.17  | 8.84  | 18.9  | 23.79 | 31      | 56.7   |      |
| 3005 HV          | m     | m   | 23  | 26  |         |         |           |         |          |      |        |     | 210       | 210 | 1627     | 6.38  | 1.99  | 2.29  | 11.58 | 41      | 22.24  |      |
| 3006 HV          | f     | f   | 47  | 24  |         |         |           |         |          |      |        |     | 161       | 161 | 4170     | 2.23  | 4.85  | 4.68  | 6.16  | 3       | 17.92  |      |
| 3007 HV          | m     | m   | 20  | 30  |         |         |           |         |          |      |        |     | 210       | 210 | 1614     | 7.58  | 10.78 | 23.61 | 26.25 | 47      | 68.22  |      |
| 3008 HV          | m     | m   | 47  | 24  |         |         |           |         |          |      |        |     | 235       | 235 | 2172     | 0.52  | 3.04  | 7.1   | 3.4   | 14      | 14.06  |      |
| 3011 HV          | f     | f   | 22  | 18  |         |         |           |         |          |      |        |     | 167       | 167 | 1290     | 0.84  | 1.49  | 0.47  | 5.4   | 2       | 8.2    |      |
| 3012 HV          | m     | m   | 23  | 27  |         |         |           |         |          |      |        |     | 200       | 200 | 1740     | 6.52  | 1     | 2.62  | 9     | 65      | 19.14  |      |
| 3013 HV          | m     | m   | 28  | 32  |         |         |           |         |          |      |        |     | 165       | 165 | 981      | 26.24 | 32.78 | 9.17  | 20.24 | 5       | 88.43  |      |
| 3015 HV          | f     | f   | 49  | 23  |         |         |           |         |          |      |        |     | 227       | 227 | 2541     | 3.07  | 5.81  | 8.81  | 8.6   | 27      | 26.29  |      |
| 4002 HV          | m     | m   | 26  | 32  |         |         |           |         |          |      |        |     | 234       | 234 | 845      | 6.67  | 2.98  | 2.91  | 4.19  | 9       | 16.75  |      |
| 4009 HV          | m     | m   | 32  | 28  |         |         |           |         |          |      |        |     | 204       | 204 | 150      | 3.6   | 3.6   | 8     | 14    | 18      | 29.2   |      |
| 4013 HV          | m     | m   | 27  | 24  |         |         |           |         |          |      |        |     | 221       | 221 | 1513     | 0.12  | 4.8   | 14.67 | 7.3   | 2       | 26.89  |      |
| 4014 HV          | m     | m   | 21  | 23  |         |         |           |         |          |      |        |     | 227       | 227 | 764      | 4.4   | 2.75  | 7.3   | 1.49  | 5       | 15.94  |      |
| 6001 HV          | m     | m   | 53  | 28  |         |         |           |         |          |      |        |     | 219       | 219 | 1399     | 5.15  | 6.86  | 10.98 | 7.25  | 36      | 30.24  |      |
| 6002 HV          | m     | m   | 44  | 41  |         |         |           |         |          |      |        |     | 94        | 94  | 205      | 7.32  | 35.54 | 20.78 | 12    | 5       | 75.64  |      |
| 6003 HV          | m     | m   | 25  | 25  |         |         |           |         |          |      |        |     | 225       | 225 | 135      | 1.33  | 1.33  | 2.67  | 19.56 | 27      | 24.89  |      |
| 7001 HV          | m     | m   | 27  | 24  |         |         |           |         |          |      |        |     | 269       | 269 | 1577     | 1.9   | 1.37  | 7.31  | 4.03  | 5       | 14.61  |      |
| 7006 HV          | f     | f   | 22  | 23  |         |         |           |         |          |      |        |     | 983       | 983 | 360      | 237   | 4.56  | 4.05  | 8.35  | 23.54   | 5      | 40.5 |
| 7007 HV          | m     | m   | 42  | 33  |         |         |           |         |          |      |        |     | 1         | 1   | 425      | 3.53  | 5.36  | 6.21  | 13.41 | 9       | 28.51  |      |
| 7009 HV          | f     | f   | 27  | 22  |         |         |           |         |          |      |        |     | 226       | 226 | 2325     | 1.06  | 7.23  | 2.43  | 9.96  | 14      | 20.68  |      |
| 7010 HV          | m     | m   | 19  | 27  |         |         |           |         |          |      |        |     | 255       | 255 | 3233     | 1.56  | 1.08  | 4.88  | 6.31  | 0       | 13.83  |      |
| 7019 HV          | m     | m   | 54  | 26  |         |         |           |         |          |      |        |     | 215       | 215 | 860      | 4.26  | 12.84 | 1.67  | 12.77 | 44      | 31.54  |      |
| 7023 HV          | f     | f   | 54  | 29  |         |         |           |         |          |      |        |     | 265       | 265 | 578      | 8.72  | 1.45  | 5.71  | 15.78 | 49      | 31.66  |      |
| 7029 HV          | f     | f   | 41  | 31  |         |         |           |         |          |      |        |     | 198       | 198 | 2531     | 2.09  | 6.59  | 3.89  | 8.51  | 12      | 21.08  |      |
| 1026 DM-Norms m  |       |     | 53  | 28  | n       | n       | n         |         |          |      | n      |     | 262       | 262 | 1336     | 4.13  | 1.21  | 8.76  | 10.56 | 35      | 24.66  |      |
| 7017 DM-Norms f  |       |     | 66  | 29  | 75 y    | n       | y         | y       |          |      | n      |     | 193       | 193 | 590      | 6.92  | 4.27  | 4.27  | 17.08 | 3       | 32.54  |      |
| 7030 DM-Norms f  |       |     | 50  | 24  | 82 y    | n       | n         |         |          |      | n      |     | 200       | 200 | 2745     | 6.34  | 11.43 | 6.64  | 15.54 | 38      | 39.95  |      |
| 7022 DM-Norms f  |       |     | 37  | 27  | 124 n   | n       | n         |         |          |      | n      |     | 249       | 249 | 3000     | 0.76  | 1.5   | 0.9   | 1.4   | 3       | 4.56   |      |
| 7018 DM-Norms f  |       |     | 53  | 28  | 155 y   | n       | n         |         |          |      | n      |     | 259       | 259 | 1226     | 2.69  | 1.22  | 7.19  | 10.86 | 11      | 21.96  |      |
| 7008 DM-Norms f  |       |     | 57  | 42  | 128 n   | y       | n         |         |          |      | n      |     | 23        | 23  | 4020     | 1.7   | 9.03  | 6.21  | 6.4   | 7       | 23.34  |      |
| 2025 DM-Norms f  |       |     | 56  | 22  | 150 n   | y       | n         |         |          |      | n      |     | 217       | 217 | 883      | 4.76  | 0.75  | 1.56  | 6.73  | 28      | 13.8   |      |
| 7027 DM-Norms f  |       |     | 59  | 30  | 168 y   | n       | y         | y       | y        |      | n      |     | -1        | -1  | 1213     | 16.03 | 13.75 | 2.97  | 9.94  | 44      | 42.69  |      |
| 7026 DM-Delaye f |       |     | 41  | 32  | 215 y   | y       | n         |         |          |      | n      |     | 320       | 320 | 5262     | 5.42  | 3.71  | 6.65  | 7.66  | 14      | 23.44  |      |
| 2027 DM-Delaye f |       |     | 39  | 27  | 95 y    | n       | n         |         |          |      | n      |     | 339       | 339 | 3628     | 3.82  | 2.75  | 5.09  | 12.25 | 13      | 23.91  |      |
| 7011 DM-Delaye m |       |     | 36  | 30  | 78 n    | n       | n         |         |          |      | n      |     | 1304      | 360 | 1909     | 2.89  | 6.51  | 23.76 | 11.03 | 3       | 44.19  |      |
| 1024 DM-Delaye f |       |     | 28  | 36  | 112 y   | y       | n         |         |          |      | n      |     | 1638      | 360 | 3840     | 2.86  | 5.7   | 0.38  | 5.64  | 3       | 14.58  |      |
| 7002 DM-Delaye f |       |     | 34  | 30  | 215 y   | n       | n         |         |          |      | n      |     | 10376     | 360 | 976      | 2.46  | 0.74  | 0.25  | 0.68  | 0       | 4.13   |      |
| 7004 DM-Delaye f |       |     | 62  | 26  | 41 y    | n       | y         | y       | y        |      | n      |     | 10363     | 360 | 4256     | 0.52  | 0.72  | 4.44  | 4.69  | 4       | 10.37  |      |
| 7031 DM-Delaye m |       |     | 42  | 27  | 175 n   | n       | n         |         |          |      | n      |     | 2499      | 360 | 7166     | 3.64  | 5.58  | 2.7   | 3.67  | 10      | 15.59  |      |
| 7033 DM-Delaye f |       |     | 37  | 18  | 83 n    | n       | y         | n       | n        | n    | n      |     | 2666      | 360 | 2261     | 1.03  | 0.77  | 0.61  | 1.7   | 0       | 4.11   |      |
| 7024 DM-Delaye m |       |     | 48  | 28  | 192 y   | n       | n         |         |          |      | n      |     | 1691      | 360 | 3091     | 0.7   | 4.46  | 1.57  | 2     | 2       | 8.73   |      |
| 7003 DM-Delaye f |       |     | 54  | 22  | 115 y   | n       | n         |         |          |      | n      |     | 1041      | 360 | 3272     | 1.16  | 2.81  | 3.7   | 3.91  | 14      | 11.58  |      |
| 7005 DM-Delaye m |       |     | 52  | 24  | 110 y   | n       | y         | n       | n        | y    | n      |     | 1115      | 360 | 1382     | 7.47  | 10.16 | 3.13  | 2.39  | 4       | 23.15  |      |
| 7020 DM-Delaye f |       |     | 26  | 34  | 140 y   | n       | y         | n       | n        | y    | y      |     | 1275      | 360 | 542      | 4.21  | 11.29 | 2.44  | 3.21  | 0       | 21.15  |      |
