# Supplementary material for: Blunting of Colon Contractions in Diabetics with Gastroparesis Quantified by Wireless Motility Capsule Methods
Source: PubMed Central journal article supplement (PMC4624915; doi:10.1371/journal.pone.0141183), 2015-10-28
Supplement: pone.0141183.s003.pdf [file pone.0141183.s003.pdf]

## 2. Raw data

### Raw data

| Obs | ID   | Group | Sex | Age | BMI | Lastnum | LastAUC  |
|-----|------|-------|-----|-----|-----|---------|----------|
| 1   | 1005 | HV    | m   | 55  | 24  | 20      | 2594.30  |
| 2   | 1009 | HV    | f   | 30  | 20  | 4       | 911.60   |
| 3   | 1014 | HV    | m   | 25  | 23  | 27      | 6076.20  |
| 4   | 1015 | HV    | f   | 22  | 22  | 16      | 4251.50  |
| 5   | 1016 | HV    | f   | 21  | 22  | 10      | 4019.20  |
| 6   | 1017 | HV    | m   | 20  | 24  | 8       | 1607.40  |
| 7   | 1018 | HV    | m   | 27  | 22  | 15      | 5783.20  |
| 8   | 1020 | HV    | m   | 34  | 29  | 12      | 3604.70  |
| 9   | 1022 | HV    | f   | 23  | 27  | 15      | 1286.80  |
| 10  | 2006 | HV    | m   | 26  | 22  | 25      | 9742.70  |
| 11  | 2007 | HV    | f   | 46  | 28  | 9       | 2580.00  |
| 12  | 2011 | HV    | m   | 38  | 27  | 17      | 4555.10  |
| 13  | 2012 | HV    | f   | 49  | 28  | 4       | 299.20   |
| 14  | 2015 | HV    | f   | 22  | 23  | 28      | 8730.80  |
| 15  | 2016 | HV    | f   | 34  | 22  | 14      | 3998.00  |
| 16  | 2018 | HV    | m   | 20  | 23  | 25      | 1929.60  |
| 17  | 3003 | HV    | m   | 22  | 29  | 11      | 1442.60  |
| 18  | 3004 | HV    | m   | 22  | 29  | 31      | 1409.97  |
| 19  | 3005 | HV    | m   | 23  | 26  | 41      | 8308.30  |
| 20  | 3006 | HV    | f   | 47  | 24  | 3       | 357.30   |
| 21  | 3007 | HV    | m   | 20  | 30  | 47      | 16731.60 |
| 22  | 3008 | HV    | m   | 47  | 24  | 14      | 3164.50  |
| 23  | 3011 | HV    | f   | 22  | 18  | 2       | 276.10   |
| 24  | 3012 | HV    | m   | 23  | 27  | 65      | 6139.60  |
| 25  | 3013 | HV    | m   | 28  | 32  | 5       | 617.10   |
| 26  | 3015 | HV    | f   | 49  | 23  | 27      | 8266.10  |
| 27  | 4002 | HV    | m   | 26  | 32  | 9       | 17966.60 |
| 28  | 4009 | HV    | m   | 32  | 28  | 18      | 2813.00  |
| 29  | 4013 | HV    | m   | 27  | 24  | 2       | 344.30   |
| 30  | 4014 | HV    | m   | 21  | 23  | 5       | 300.30   |

## Raw data

| Obs | ID   | Group      | Sex | Age | BMI | Lastnum | LastAUC  |
|-----|------|------------|-----|-----|-----|---------|----------|
| 31  | 6001 | HV         | m   | 53  | 28  | 36      | 6356.90  |
| 32  | 6002 | HV         | m   | 44  | 41  | 5       | 370.40   |
| 33  | 6003 | HV         | m   | 25  | 25  | 27      | 4402.20  |
| 34  | 7001 | HV         | m   | 27  | 24  | 5       | 811.20   |
| 35  | 7006 | HV         | f   | 22  | 23  | 5       | 1496.00  |
| 36  | 7007 | HV         | m   | 42  | 33  | 9       | 485.10   |
| 37  | 7009 | HV         | f   | 27  | 22  | 14      | 3567.10  |
| 38  | 7010 | HV         | m   | 19  | 27  | 0       | 0.00     |
| 39  | 7019 | HV         | m   | 54  | 26  | 44      | 8237.90  |
| 40  | 7023 | HV         | f   | 54  | 29  | 49      | 4075.40  |
| 41  | 7029 | HV         | f   | 41  | 31  | 12      | 2323.20  |
| 42  | 1026 | DM-Normal  | m   | 53  | 28  | 35      | 7357.90  |
| 43  | 7003 | DM-Normal  | f   | 66  | 29  | 3       | 190.00   |
| 44  | 7005 | DM-Normal  | f   | 50  | 24  | 38      | 13247.70 |
| 45  | 7017 | DM-Normal  | f   | 37  | 27  | 3       | 234.30   |
| 46  | 7026 | DM-Normal  | f   | 53  | 28  | 11      | 4182.10  |
| 47  | 7030 | DM-Normal  | f   | 57  | 42  | 7       | 2069.20  |
| 48  | 7022 | DM-Normal  | f   | 56  | 22  | 28      | 6705.50  |
| 49  | 7020 | DM-Normal  | f   | 59  | 30  | 44      | 13655.40 |
| 50  | 7018 | DM-Delayed | f   | 41  | 32  | 14      | 3577.70  |
| 51  | 7008 | DM-Delayed | f   | 39  | 27  | 13      | 7120.80  |
| 52  | 2025 | DM-Delayed | m   | 36  | 30  | 3       | 796.50   |
| 53  | 7027 | DM-Delayed | f   | 28  | 36  | 3       | 922.20   |
| 54  | 7011 | DM-Delayed | f   | 34  | 30  | 0       | 0.00     |
| 55  | 1024 | DM-Delayed | f   | 62  | 26  | 4       | 1229.70  |
| 56  | 2027 | DM-Delayed | m   | 42  | 27  | 10      | 4010.70  |
| 57  | 7002 | DM-Delayed | f   | 37  | 18  | 0       | 0.00     |
| 58  | 7004 | DM-Delayed | m   | 48  | 28  | 2       | 404.10   |
| 59  | 7031 | DM-Delayed | f   | 54  | 22  | 14      | 9808.70  |

### Raw data

| Obs | ID   | Group      | Sex | Age | BMI | Lastnum | LastAUC |
|-----|------|------------|-----|-----|-----|---------|---------|
| 60  | 7033 | DM-Delayed | m   | 52  | 24  | 4       | 5334.20 |
| 61  | 7024 | DM-Delayed | f   | 26  | 34  | 0       | 0.00    |

### Raw data

| Obs | ID   | Group | Sex | Age | BMI | time         | Qnum  | Qauc   |
|-----|------|-------|-----|-----|-----|--------------|-------|--------|
| 1   | 1005 | HV    | m   | 55  | 24  | 1st quartile | 3.38  | 323.5  |
| 2   | 1005 | HV    | m   | 55  | 24  | 2nd quartile | 5.92  | 2862.4 |
| 3   | 1005 | HV    | m   | 55  | 24  | 3rd quartile | 1.71  | 240.3  |
| 4   | 1005 | HV    | m   | 55  | 24  | 4th quartile | 17.75 | 2816.1 |
| 5   | 1009 | HV    | f   | 30  | 20  | 1st quartile | 2.21  | 434.5  |
| 6   | 1009 | HV    | f   | 30  | 20  | 2nd quartile | 14.58 | 4027.3 |
| 7   | 1009 | HV    | f   | 30  | 20  | 3rd quartile | 9.75  | 2282.3 |
| 8   | 1009 | HV    | f   | 30  | 20  | 4th quartile | 12.18 | 3542.8 |
| 9   | 1014 | HV    | m   | 25  | 23  | 1st quartile | 12.12 | 1723.7 |
| 10  | 1014 | HV    | m   | 25  | 23  | 2nd quartile | 0.80  | 258.7  |
| 11  | 1014 | HV    | m   | 25  | 23  | 3rd quartile | 5.53  | 1770.5 |
| 12  | 1014 | HV    | m   | 25  | 23  | 4th quartile | 15.69 | 3321.5 |
| 13  | 1015 | HV    | f   | 22  | 22  | 1st quartile | 3.26  | 257.8  |
| 14  | 1015 | HV    | f   | 22  | 22  | 2nd quartile | 0.91  | 122.1  |
| 15  | 1015 | HV    | f   | 22  | 22  | 3rd quartile | 5.29  | 1727.6 |
| 16  | 1015 | HV    | f   | 22  | 22  | 4th quartile | 14.90 | 5183.7 |
| 17  | 1016 | HV    | f   | 21  | 22  | 1st quartile | 8.04  | 832.0  |
| 18  | 1016 | HV    | f   | 21  | 22  | 2nd quartile | 14.75 | 3719.0 |
| 19  | 1016 | HV    | f   | 21  | 22  | 3rd quartile | 21.99 | 5091.3 |
| 20  | 1016 | HV    | f   | 21  | 22  | 4th quartile | 8.66  | 1678.4 |
| 21  | 1017 | HV    | m   | 20  | 24  | 1st quartile | 3.12  | 281.9  |
| 22  | 1017 | HV    | m   | 20  | 24  | 2nd quartile | 7.79  | 630.3  |
| 23  | 1017 | HV    | m   | 20  | 24  | 3rd quartile | 7.79  | 1029.5 |
| 24  | 1017 | HV    | m   | 20  | 24  | 4th quartile | 11.30 | 6566.8 |
| 25  | 1018 | HV    | m   | 27  | 22  | 1st quartile | 0.00  | 0.0    |
| 26  | 1018 | HV    | m   | 27  | 22  | 2nd quartile | 2.32  | 145.8  |
| 27  | 1018 | HV    | m   | 27  | 22  | 3rd quartile | 4.06  | 520.1  |
| 28  | 1018 | HV    | m   | 27  | 22  | 4th quartile | 13.62 | 3896.0 |
| 29  | 1020 | HV    | m   | 34  | 29  | 1st quartile | 0.42  | 51.3   |
| 30  | 1020 | HV    | m   | 34  | 29  | 2nd quartile | 3.82  | 314.0  |

### Raw data

| Obs | ID   | Group | Sex | Age | BMI | time         | Qnum  | Qauc   |
|-----|------|-------|-----|-----|-----|--------------|-------|--------|
| 31  | 1020 | HV    | m   | 34  | 29  | 3rd quartile | 9.62  | 1514.7 |
| 32  | 1020 | HV    | m   | 34  | 29  | 4th quartile | 4.34  | 856.0  |
| 33  | 1022 | HV    | f   | 23  | 27  | 1st quartile | 1.57  | 117.2  |
| 34  | 1022 | HV    | f   | 23  | 27  | 2nd quartile | 4.88  | 1196.8 |
| 35  | 1022 | HV    | f   | 23  | 27  | 3rd quartile | 10.44 | 2620.4 |
| 36  | 1022 | HV    | f   | 23  | 27  | 4th quartile | 2.59  | 635.9  |
| 37  | 2006 | HV    | m   | 26  | 22  | 1st quartile | 1.01  | 139.6  |
| 38  | 2006 | HV    | m   | 26  | 22  | 2nd quartile | 0.32  | 429.4  |
| 39  | 2006 | HV    | m   | 26  | 22  | 3rd quartile | 0.44  | 43.6   |
| 40  | 2006 | HV    | m   | 26  | 22  | 4th quartile | 6.89  | 2285.1 |
| 41  | 2007 | HV    | f   | 46  | 28  | 1st quartile | 10.27 | 710.9  |
| 42  | 2007 | HV    | f   | 46  | 28  | 2nd quartile | 0.89  | 128.3  |
| 43  | 2007 | HV    | f   | 46  | 28  | 3rd quartile | 8.70  | 1583.8 |
| 44  | 2007 | HV    | f   | 46  | 28  | 4th quartile | 6.92  | 1512.8 |
| 45  | 2011 | HV    | m   | 38  | 27  | 1st quartile | 2.58  | 234.0  |
| 46  | 2011 | HV    | m   | 38  | 27  | 2nd quartile | 1.17  | 188.9  |
| 47  | 2011 | HV    | m   | 38  | 27  | 3rd quartile | 3.99  | 480.9  |
| 48  | 2011 | HV    | m   | 38  | 27  | 4th quartile | 8.15  | 1659.7 |
| 49  | 2012 | HV    | f   | 49  | 28  | 1st quartile | 10.95 | 1637.2 |
| 50  | 2012 | HV    | f   | 49  | 28  | 2nd quartile | 7.88  | 725.5  |
| 51  | 2012 | HV    | f   | 49  | 28  | 3rd quartile | 2.63  | 149.9  |
| 52  | 2012 | HV    | f   | 49  | 28  | 4th quartile | 5.69  | 579.5  |
| 53  | 2015 | HV    | f   | 22  | 23  | 1st quartile | 11.78 | 1112.6 |
| 54  | 2015 | HV    | f   | 22  | 23  | 2nd quartile | 5.90  | 988.2  |
| 55  | 2015 | HV    | f   | 22  | 23  | 3rd quartile | 6.42  | 1295.1 |
| 56  | 2015 | HV    | f   | 22  | 23  | 4th quartile | 5.93  | 1884.2 |
| 57  | 2016 | HV    | f   | 34  | 22  | 1st quartile | 4.90  | 328.6  |
| 58  | 2016 | HV    | f   | 34  | 22  | 2nd quartile | 1.21  | 63.0   |
| 59  | 2016 | HV    | f   | 34  | 22  | 3rd quartile | 2.02  | 154.4  |
| 60  | 2016 | HV    | f   | 34  | 22  | 4th quartile | 9.19  | 1750.2 |

### Raw data

| Obs | ID   | Group | Sex | Age | BMI | time         | Qnum  | Qauc   |
|-----|------|-------|-----|-----|-----|--------------|-------|--------|
| 61  | 2018 | HV    | m   | 20  | 23  | 1st quartile | 6.57  | 664.6  |
| 62  | 2018 | HV    | m   | 20  | 23  | 2nd quartile | 0.30  | 24.7   |
| 63  | 2018 | HV    | m   | 20  | 23  | 3rd quartile | 0.00  | 0.0    |
| 64  | 2018 | HV    | m   | 20  | 23  | 4th quartile | 2.14  | 163.9  |
| 65  | 3003 | HV    | m   | 22  | 29  | 1st quartile | 32.75 | 2564.3 |
| 66  | 3003 | HV    | m   | 22  | 29  | 2nd quartile | 55.62 | 3727.8 |
| 67  | 3003 | HV    | m   | 22  | 29  | 3rd quartile | 2.84  | 269.6  |
| 68  | 3003 | HV    | m   | 22  | 29  | 4th quartile | 11.02 | 1735.9 |
| 69  | 3004 | HV    | m   | 22  | 29  | 1st quartile | 5.17  | 410.6  |
| 70  | 3004 | HV    | m   | 22  | 29  | 2nd quartile | 8.84  | 1113.4 |
| 71  | 3004 | HV    | m   | 22  | 29  | 3rd quartile | 18.90 | 2098.7 |
| 72  | 3004 | HV    | m   | 22  | 29  | 4th quartile | 23.79 | 1874.8 |
| 73  | 3005 | HV    | m   | 23  | 26  | 1st quartile | 6.38  | 529.6  |
| 74  | 3005 | HV    | m   | 23  | 26  | 2nd quartile | 1.99  | 133.2  |
| 75  | 3005 | HV    | m   | 23  | 26  | 3rd quartile | 2.29  | 861.1  |
| 76  | 3005 | HV    | m   | 23  | 26  | 4th quartile | 11.58 | 7854.7 |
| 77  | 3006 | HV    | f   | 47  | 24  | 1st quartile | 2.23  | 370.0  |
| 78  | 3006 | HV    | f   | 47  | 24  | 2nd quartile | 4.85  | 1074.3 |
| 79  | 3006 | HV    | f   | 47  | 24  | 3rd quartile | 4.68  | 1123.7 |
| 80  | 3006 | HV    | f   | 47  | 24  | 4th quartile | 6.16  | 1780.9 |
| 81  | 3007 | HV    | m   | 20  | 30  | 1st quartile | 7.58  | 637.4  |
| 82  | 3007 | HV    | m   | 20  | 30  | 2nd quartile | 10.78 | 1848.3 |
| 83  | 3007 | HV    | m   | 20  | 30  | 3rd quartile | 23.61 | 5232.4 |
| 84  | 3007 | HV    | m   | 20  | 30  | 4th quartile | 26.25 | 5886.3 |
| 85  | 3008 | HV    | m   | 47  | 24  | 1st quartile | 0.52  | 25.5   |
| 86  | 3008 | HV    | m   | 47  | 24  | 2nd quartile | 3.04  | 294.9  |
| 87  | 3008 | HV    | m   | 47  | 24  | 3rd quartile | 7.10  | 1319.3 |
| 88  | 3008 | HV    | m   | 47  | 24  | 4th quartile | 3.40  | 923.4  |
| 89  | 3011 | HV    | f   | 22  | 18  | 1st quartile | 0.84  | 46.5   |
| 90  | 3011 | HV    | f   | 22  | 18  | 2nd quartile | 1.49  | 127.8  |

### Raw data

| Obs | ID   | Group | Sex | Age | BMI | time         | Qnum  | Qauc   |
|-----|------|-------|-----|-----|-----|--------------|-------|--------|
| 91  | 3011 | HV    | f   | 22  | 18  | 3rd quartile | 0.47  | 67.5   |
| 92  | 3011 | HV    | f   | 22  | 18  | 4th quartile | 5.40  | 1467.0 |
| 93  | 3012 | HV    | m   | 23  | 27  | 1st quartile | 6.52  | 328.2  |
| 94  | 3012 | HV    | m   | 23  | 27  | 2nd quartile | 1.00  | 46.7   |
| 95  | 3012 | HV    | m   | 23  | 27  | 3rd quartile | 2.62  | 227.3  |
| 96  | 3012 | HV    | m   | 23  | 27  | 4th quartile | 9.00  | 1176.1 |
| 97  | 3013 | HV    | m   | 28  | 32  | 1st quartile | 26.24 | 4537.2 |
| 98  | 3013 | HV    | m   | 28  | 32  | 2nd quartile | 32.78 | 6724.0 |
| 99  | 3013 | HV    | m   | 28  | 32  | 3rd quartile | 9.17  | 4118.1 |
| 100 | 3013 | HV    | m   | 28  | 32  | 4th quartile | 20.24 | 3940.9 |
| 101 | 3015 | HV    | f   | 49  | 23  | 1st quartile | 3.07  | 300.1  |
| 102 | 3015 | HV    | f   | 49  | 23  | 2nd quartile | 5.81  | 1268.3 |
| 103 | 3015 | HV    | f   | 49  | 23  | 3rd quartile | 8.81  | 2221.8 |
| 104 | 3015 | HV    | f   | 49  | 23  | 4th quartile | 8.60  | 2519.4 |
| 105 | 4002 | HV    | m   | 26  | 32  | 1st quartile | 6.67  | 2221.5 |
| 106 | 4002 | HV    | m   | 26  | 32  | 2nd quartile | 2.98  | 964.5  |
| 107 | 4002 | HV    | m   | 26  | 32  | 3rd quartile | 2.91  | 2947.0 |
| 108 | 4002 | HV    | m   | 26  | 32  | 4th quartile | 4.19  | 2750.6 |
| 109 | 4009 | HV    | m   | 32  | 28  | 1st quartile | 3.60  | 480.3  |
| 110 | 4009 | HV    | m   | 32  | 28  | 2nd quartile | 3.60  | 324.6  |
| 111 | 4009 | HV    | m   | 32  | 28  | 3rd quartile | 8.00  | 772.2  |
| 112 | 4009 | HV    | m   | 32  | 28  | 4th quartile | 14.00 | 2014.0 |
| 113 | 4013 | HV    | m   | 27  | 24  | 1st quartile | 0.12  | 10.1   |
| 114 | 4013 | HV    | m   | 27  | 24  | 2nd quartile | 4.80  | 1906.8 |
| 115 | 4013 | HV    | m   | 27  | 24  | 3rd quartile | 14.67 | 7791.7 |
| 116 | 4013 | HV    | m   | 27  | 24  | 4th quartile | 7.30  | 1865.4 |
| 117 | 4014 | HV    | m   | 21  | 23  | 1st quartile | 4.40  | 730.8  |
| 118 | 4014 | HV    | m   | 21  | 23  | 2nd quartile | 2.75  | 693.5  |
| 119 | 4014 | HV    | m   | 21  | 23  | 3rd quartile | 7.30  | 1665.9 |
| 120 | 4014 | HV    | m   | 21  | 23  | 4th quartile | 1.49  | 97.1   |



## Raw data

| Obs | ID   | Group | Sex | Age | BMI | time         | Qnum  | Qauc   |
|-----|------|-------|-----|-----|-----|--------------|-------|--------|
| 121 | 6001 | HV    | m   | 53  | 28  | 1st quartile | 5.15  | 530.5  |
| 122 | 6001 | HV    | m   | 53  | 28  | 2nd quartile | 6.86  | 1790.2 |
| 123 | 6001 | HV    | m   | 53  | 28  | 3rd quartile | 10.98 | 1755.5 |
| 124 | 6001 | HV    | m   | 53  | 28  | 4th quartile | 7.25  | 752.1  |
| 125 | 6002 | HV    | m   | 44  | 41  | 1st quartile | 7.32  | 1160.0 |
| 126 | 6002 | HV    | m   | 44  | 41  | 2nd quartile | 35.54 | 3839.3 |
| 127 | 6002 | HV    | m   | 44  | 41  | 3rd quartile | 20.78 | 2140.1 |
| 128 | 6002 | HV    | m   | 44  | 41  | 4th quartile | 12.00 | 1184.9 |
| 129 | 6003 | HV    | m   | 25  | 25  | 1st quartile | 1.33  | 68.4   |
| 130 | 6003 | HV    | m   | 25  | 25  | 2nd quartile | 1.33  | 41.4   |
| 131 | 6003 | HV    | m   | 25  | 25  | 3rd quartile | 2.67  | 179.2  |
| 132 | 6003 | HV    | m   | 25  | 25  | 4th quartile | 19.56 | 3282.8 |
| 133 | 7001 | HV    | m   | 27  | 24  | 1st quartile | 1.90  | 178.5  |
| 134 | 7001 | HV    | m   | 27  | 24  | 2nd quartile | 1.37  | 193.4  |
| 135 | 7001 | HV    | m   | 27  | 24  | 3rd quartile | 7.31  | 2163.6 |
| 136 | 7001 | HV    | m   | 27  | 24  | 4th quartile | 4.03  | 1140.2 |
| 137 | 7006 | HV    | f   | 22  | 23  | 1st quartile | 4.56  | 812.4  |
| 138 | 7006 | HV    | f   | 22  | 23  | 2nd quartile | 4.05  | 1400.0 |
| 139 | 7006 | HV    | f   | 22  | 23  | 3rd quartile | 8.35  | 2676.1 |
| 140 | 7006 | HV    | f   | 22  | 23  | 4th quartile | 23.54 | 6948.5 |
| 141 | 7007 | HV    | m   | 42  | 33  | 1st quartile | 3.53  | 394.3  |
| 142 | 7007 | HV    | m   | 42  | 33  | 2nd quartile | 5.36  | 674.0  |
| 143 | 7007 | HV    | m   | 42  | 33  | 3rd quartile | 6.21  | 893.5  |
| 144 | 7007 | HV    | m   | 42  | 33  | 4th quartile | 13.41 | 1267.3 |
| 145 | 7009 | HV    | f   | 27  | 22  | 1st quartile | 1.06  | 73.3   |
| 146 | 7009 | HV    | f   | 27  | 22  | 2nd quartile | 7.23  | 912.1  |
| 147 | 7009 | HV    | f   | 27  | 22  | 3rd quartile | 2.43  | 406.4  |
| 148 | 7009 | HV    | f   | 27  | 22  | 4th quartile | 9.96  | 2247.9 |
| 149 | 7010 | HV    | m   | 19  | 27  | 1st quartile | 1.56  | 85.7   |
| 150 | 7010 | HV    | m   | 19  | 27  | 2nd quartile | 1.08  | 87.3   |

### Raw data

| Obs | ID   | Group     | Sex | Age | BMI | time         | Qnum  | Qauc   |
|-----|------|-----------|-----|-----|-----|--------------|-------|--------|
| 151 | 7010 | HV        | m   | 19  | 27  | 3rd quartile | 4.88  | 1416.5 |
| 152 | 7010 | HV        | m   | 19  | 27  | 4th quartile | 6.31  | 1538.6 |
| 153 | 7019 | HV        | m   | 54  | 26  | 1st quartile | 4.26  | 432.6  |
| 154 | 7019 | HV        | m   | 54  | 26  | 2nd quartile | 12.84 | 1680.3 |
| 155 | 7019 | HV        | m   | 54  | 26  | 3rd quartile | 1.67  | 273.1  |
| 156 | 7019 | HV        | m   | 54  | 26  | 4th quartile | 12.77 | 2707.2 |
| 157 | 7023 | HV        | f   | 54  | 29  | 1st quartile | 8.72  | 415.0  |
| 158 | 7023 | HV        | f   | 54  | 29  | 2nd quartile | 1.45  | 104.7  |
| 159 | 7023 | HV        | f   | 54  | 29  | 3rd quartile | 5.71  | 454.7  |
| 160 | 7023 | HV        | f   | 54  | 29  | 4th quartile | 15.78 | 1159.3 |
| 161 | 7029 | HV        | f   | 41  | 31  | 1st quartile | 2.09  | 376.4  |
| 162 | 7029 | HV        | f   | 41  | 31  | 2nd quartile | 6.59  | 1500.8 |
| 163 | 7029 | HV        | f   | 41  | 31  | 3rd quartile | 3.89  | 981.3  |
| 164 | 7029 | HV        | f   | 41  | 31  | 4th quartile | 8.51  | 3299.8 |
| 165 | 1026 | DM-Normal | m   | 53  | 28  | 1st quartile | 4.13  | 296.5  |
| 166 | 1026 | DM-Normal | m   | 53  | 28  | 2nd quartile | 1.21  | 117.4  |
| 167 | 1026 | DM-Normal | m   | 53  | 28  | 3rd quartile | 8.76  | 2003.7 |
| 168 | 1026 | DM-Normal | m   | 53  | 28  | 4th quartile | 10.56 | 2460.8 |
| 169 | 7003 | DM-Normal | f   | 66  | 29  | 1st quartile | 6.92  | 878.6  |
| 170 | 7003 | DM-Normal | f   | 66  | 29  | 2nd quartile | 4.27  | 741.2  |
| 171 | 7003 | DM-Normal | f   | 66  | 29  | 3rd quartile | 4.27  | 620.2  |
| 172 | 7003 | DM-Normal | f   | 66  | 29  | 4th quartile | 17.08 | 3712.9 |
| 173 | 7005 | DM-Normal | f   | 50  | 24  | 1st quartile | 6.34  | 1511.5 |
| 174 | 7005 | DM-Normal | f   | 50  | 24  | 2nd quartile | 11.43 | 4452.2 |
| 175 | 7005 | DM-Normal | f   | 50  | 24  | 3rd quartile | 6.64  | 3955.0 |
| 176 | 7005 | DM-Normal | f   | 50  | 24  | 4th quartile | 15.54 | 9308.4 |
| 177 | 7017 | DM-Normal | f   | 37  | 27  | 1st quartile | 0.76  | 38.5   |
| 178 | 7017 | DM-Normal | f   | 37  | 27  | 2nd quartile | 1.50  | 94.7   |
| 179 | 7017 | DM-Normal | f   | 37  | 27  | 3rd quartile | 0.90  | 118.9  |
| 180 | 7017 | DM-Normal | f   | 37  | 27  | 4th quartile | 1.40  | 184.3  |

## Raw data

| Obs | ID   | Group      | Sex | Age | BMI | time         | Qnum  | Qauc    |
|-----|------|------------|-----|-----|-----|--------------|-------|---------|
| 181 | 7026 | DM-Normal  | f   | 53  | 28  | 1st quartile | 2.69  | 192.4   |
| 182 | 7026 | DM-Normal  | f   | 53  | 28  | 2nd quartile | 1.22  | 134.6   |
| 183 | 7026 | DM-Normal  | f   | 53  | 28  | 3rd quartile | 7.19  | 1126.6  |
| 184 | 7026 | DM-Normal  | f   | 53  | 28  | 4th quartile | 10.86 | 2733.9  |
| 185 | 7030 | DM-Normal  | f   | 57  | 42  | 1st quartile | 1.70  | 312.1   |
| 186 | 7030 | DM-Normal  | f   | 57  | 42  | 2nd quartile | 9.03  | 1237.3  |
| 187 | 7030 | DM-Normal  | f   | 57  | 42  | 3rd quartile | 6.21  | 2011.8  |
| 188 | 7030 | DM-Normal  | f   | 57  | 42  | 4th quartile | 6.40  | 1887.5  |
| 189 | 7022 | DM-Normal  | f   | 56  | 22  | 1st quartile | 4.76  | 579.3   |
| 190 | 7022 | DM-Normal  | f   | 56  | 22  | 2nd quartile | 0.75  | 79.8    |
| 191 | 7022 | DM-Normal  | f   | 56  | 22  | 3rd quartile | 1.56  | 159.5   |
| 192 | 7022 | DM-Normal  | f   | 56  | 22  | 4th quartile | 6.73  | 1271.7  |
| 193 | 7020 | DM-Normal  | f   | 59  | 30  | 1st quartile | 16.03 | 1842.0  |
| 194 | 7020 | DM-Normal  | f   | 59  | 30  | 2nd quartile | 13.75 | 4744.6  |
| 195 | 7020 | DM-Normal  | f   | 59  | 30  | 3rd quartile | 2.97  | 512.0   |
| 196 | 7020 | DM-Normal  | f   | 59  | 30  | 4th quartile | 9.94  | 2180.1  |
| 197 | 7018 | DM-Delayed | f   | 41  | 32  | 1st quartile | 5.42  | 447.9   |
| 198 | 7018 | DM-Delayed | f   | 41  | 32  | 2nd quartile | 3.71  | 616.7   |
| 199 | 7018 | DM-Delayed | f   | 41  | 32  | 3rd quartile | 6.65  | 1471.5  |
| 200 | 7018 | DM-Delayed | f   | 41  | 32  | 4th quartile | 7.66  | 2196.0  |
| 201 | 7008 | DM-Delayed | f   | 39  | 27  | 1st quartile | 3.82  | 249.7   |
| 202 | 7008 | DM-Delayed | f   | 39  | 27  | 2nd quartile | 2.75  | 265.0   |
| 203 | 7008 | DM-Delayed | f   | 39  | 27  | 3rd quartile | 5.09  | 1643.1  |
| 204 | 7008 | DM-Delayed | f   | 39  | 27  | 4th quartile | 12.25 | 6012.1  |
| 205 | 2025 | DM-Delayed | m   | 36  | 30  | 1st quartile | 2.89  | 682.7   |
| 206 | 2025 | DM-Delayed | m   | 36  | 30  | 2nd quartile | 6.51  | 2286.1  |
| 207 | 2025 | DM-Delayed | m   | 36  | 30  | 3rd quartile | 23.76 | 12534.1 |
| 208 | 2025 | DM-Delayed | m   | 36  | 30  | 4th quartile | 11.03 | 4331.6  |
| 209 | 7027 | DM-Delayed | f   | 28  | 36  | 1st quartile | 2.86  | 703.7   |
| 210 | 7027 | DM-Delayed | f   | 28  | 36  | 2nd quartile | 5.70  | 1240.5  |

### Raw data

| Obs | ID   | Group      | Sex | Age | BMI | time         | Qnum  | Qauc   |
|-----|------|------------|-----|-----|-----|--------------|-------|--------|
| 211 | 7027 | DM-Delayed | f   | 28  | 36  | 3rd quartile | 0.38  | 949.7  |
| 212 | 7027 | DM-Delayed | f   | 28  | 36  | 4th quartile | 5.64  | 1933.0 |
| 213 | 7011 | DM-Delayed | f   | 34  | 30  | 1st quartile | 2.46  | 319.9  |
| 214 | 7011 | DM-Delayed | f   | 34  | 30  | 2nd quartile | 0.74  | 2588.2 |
| 215 | 7011 | DM-Delayed | f   | 34  | 30  | 3rd quartile | 0.25  | 27.3   |
| 216 | 7011 | DM-Delayed | f   | 34  | 30  | 4th quartile | 0.68  | 333.7  |
| 217 | 1024 | DM-Delayed | f   | 62  | 26  | 1st quartile | 0.52  | 60.8   |
| 218 | 1024 | DM-Delayed | f   | 62  | 26  | 2nd quartile | 0.72  | 146.8  |
| 219 | 1024 | DM-Delayed | f   | 62  | 26  | 3rd quartile | 4.44  | 924.3  |
| 220 | 1024 | DM-Delayed | f   | 62  | 26  | 4th quartile | 4.69  | 1315.1 |
| 221 | 2027 | DM-Delayed | m   | 42  | 27  | 1st quartile | 3.64  | 721.6  |
| 222 | 2027 | DM-Delayed | m   | 42  | 27  | 2nd quartile | 5.58  | 1756.1 |
| 223 | 2027 | DM-Delayed | m   | 42  | 27  | 3rd quartile | 2.70  | 2328.1 |
| 224 | 2027 | DM-Delayed | m   | 42  | 27  | 4th quartile | 3.67  | 3367.3 |
| 225 | 7002 | DM-Delayed | f   | 37  | 18  | 1st quartile | 1.03  | 163.7  |
| 226 | 7002 | DM-Delayed | f   | 37  | 18  | 2nd quartile | 0.77  | 258.9  |
| 227 | 7002 | DM-Delayed | f   | 37  | 18  | 3rd quartile | 0.61  | 1137.6 |
| 228 | 7002 | DM-Delayed | f   | 37  | 18  | 4th quartile | 1.70  | 378.8  |
| 229 | 7004 | DM-Delayed | m   | 48  | 28  | 1st quartile | 0.70  | 96.3   |
| 230 | 7004 | DM-Delayed | m   | 48  | 28  | 2nd quartile | 4.46  | 1366.5 |
| 231 | 7004 | DM-Delayed | m   | 48  | 28  | 3rd quartile | 1.57  | 307.2  |
| 232 | 7004 | DM-Delayed | m   | 48  | 28  | 4th quartile | 2.00  | 399.4  |
| 233 | 7031 | DM-Delayed | f   | 54  | 22  | 1st quartile | 1.16  | 179.2  |
| 234 | 7031 | DM-Delayed | f   | 54  | 22  | 2nd quartile | 2.81  | 795.4  |
| 235 | 7031 | DM-Delayed | f   | 54  | 22  | 3rd quartile | 3.70  | 1002.8 |
| 236 | 7031 | DM-Delayed | f   | 54  | 22  | 4th quartile | 3.91  | 1444.7 |
| 237 | 7033 | DM-Delayed | m   | 52  | 24  | 1st quartile | 7.47  | 2167.8 |
| 238 | 7033 | DM-Delayed | m   | 52  | 24  | 2nd quartile | 10.16 | 3061.9 |
| 239 | 7033 | DM-Delayed | m   | 52  | 24  | 3rd quartile | 3.13  | 959.0  |
| 240 | 7033 | DM-Delayed | m   | 52  | 24  | 4th quartile | 2.39  | 726.4  |

### Raw data

| Obs | ID   | Group      | Sex | Age | BMI | time         | Qnum  | Qauc   |
|-----|------|------------|-----|-----|-----|--------------|-------|--------|
| 241 | 7024 | DM-Delayed | f   | 26  | 34  | 1st quartile | 4.21  | 416.0  |
| 242 | 7024 | DM-Delayed | f   | 26  | 34  | 2nd quartile | 11.29 | 1424.6 |
| 243 | 7024 | DM-Delayed | f   | 26  | 34  | 3rd quartile | 2.44  | 189.2  |
| 244 | 7024 | DM-Delayed | f   | 26  | 34  | 4th quartile | 3.21  | 281.0  |

### 3. Analysis of Number of Contr/15 mins

**Analysis of endpoint Qnum by GET quartile and group  
Descriptive statistics by variable(s) group time**

| Analysis Variable : Qnum |              |     |    |        |         |           |        |         |         |
|--------------------------|--------------|-----|----|--------|---------|-----------|--------|---------|---------|
| Group                    | time         | N   |    | Mean   | Std Dev | Std Error | Range  | Minimum | Maximum |
|                          |              | Obs | N  |        |         |           |        |         |         |
| DM-Delayed               | 1st quartile | 12  | 12 | 3.015  | 2.076   | 0.599     | 6.950  | 0.520   | 7.470   |
|                          | 2nd quartile | 12  | 12 | 4.600  | 3.484   | 1.006     | 10.570 | 0.720   | 11.290  |
|                          | 3rd quartile | 12  | 12 | 4.560  | 6.358   | 1.835     | 23.510 | 0.250   | 23.760  |
|                          | 4th quartile | 12  | 12 | 4.903  | 3.667   | 1.059     | 11.570 | 0.680   | 12.250  |
| DM-Normal                | 1st quartile | 8   | 8  | 5.416  | 4.792   | 1.694     | 15.270 | 0.760   | 16.030  |
|                          | 2nd quartile | 8   | 8  | 5.395  | 5.243   | 1.854     | 13.000 | 0.750   | 13.750  |
|                          | 3rd quartile | 8   | 8  | 4.813  | 2.831   | 1.001     | 7.860  | 0.900   | 8.760   |
|                          | 4th quartile | 8   | 8  | 9.814  | 5.060   | 1.789     | 15.680 | 1.400   | 17.080  |
| HV                       | 1st quartile | 41  | 41 | 5.604  | 6.411   | 1.001     | 32.750 | 0.000   | 32.750  |
|                          | 2nd quartile | 41  | 41 | 7.255  | 10.753  | 1.679     | 55.320 | 0.300   | 55.620  |
|                          | 3rd quartile | 41  | 41 | 7.040  | 5.793   | 0.905     | 23.610 | 0.000   | 23.610  |
|                          | 4th quartile | 41  | 41 | 10.524 | 6.121   | 0.956     | 24.760 | 1.490   | 26.250  |

| Analysis Variable : Qnum |              |     |          |           |          |        |          |           |           |
|--------------------------|--------------|-----|----------|-----------|----------|--------|----------|-----------|-----------|
| Group                    | time         | N   |          | Lower     |          |        | Upper    |           |           |
|                          |              | Obs | 5th Pctl | 10th Pctl | Quartile | Median | Quartile | 90th Pctl | 95th Pctl |
| DM-Delayed               | 1st quartile | 12  | 0.520    | 0.700     | 1.095    | 2.875  | 4.015    | 5.420     | 7.470     |
|                          | 2nd quartile | 12  | 0.720    | 0.740     | 1.760    | 4.085  | 6.105    | 10.160    | 11.290    |
|                          | 3rd quartile | 12  | 0.250    | 0.380     | 1.090    | 2.915  | 4.765    | 6.650     | 23.760    |
|                          | 4th quartile | 12  | 0.680    | 1.700     | 2.195    | 3.790  | 6.650    | 11.030    | 12.250    |
| DM-Normal                | 1st quartile | 8   | 0.760    | 0.760     | 2.195    | 4.445  | 6.630    | 16.030    | 16.030    |
|                          | 2nd quartile | 8   | 0.750    | 0.750     | 1.215    | 2.885  | 10.230   | 13.750    | 13.750    |
|                          | 3rd quartile | 8   | 0.900    | 0.900     | 2.265    | 5.240  | 6.915    | 8.760     | 8.760     |
|                          | 4th quartile | 8   | 1.400    | 1.400     | 6.565    | 10.250 | 13.200   | 17.080    | 17.080    |
| HV                       | 1st quartile | 41  | 0.420    | 0.840     | 1.900    | 3.600  | 6.670    | 10.950    | 12.120    |
|                          | 2nd quartile | 41  | 0.800    | 0.910     | 1.370    | 4.050  | 7.230    | 14.580    | 32.780    |
|                          | 3rd quartile | 41  | 0.470    | 1.710     | 2.670    | 5.710  | 8.810    | 14.670    | 20.780    |
|                          | 4th quartile | 41  | 2.590    | 4.030     | 6.160    | 9.000  | 13.620   | 19.560    | 23.540    |

# Analysis of endpoint Qnum by GET quartile and group

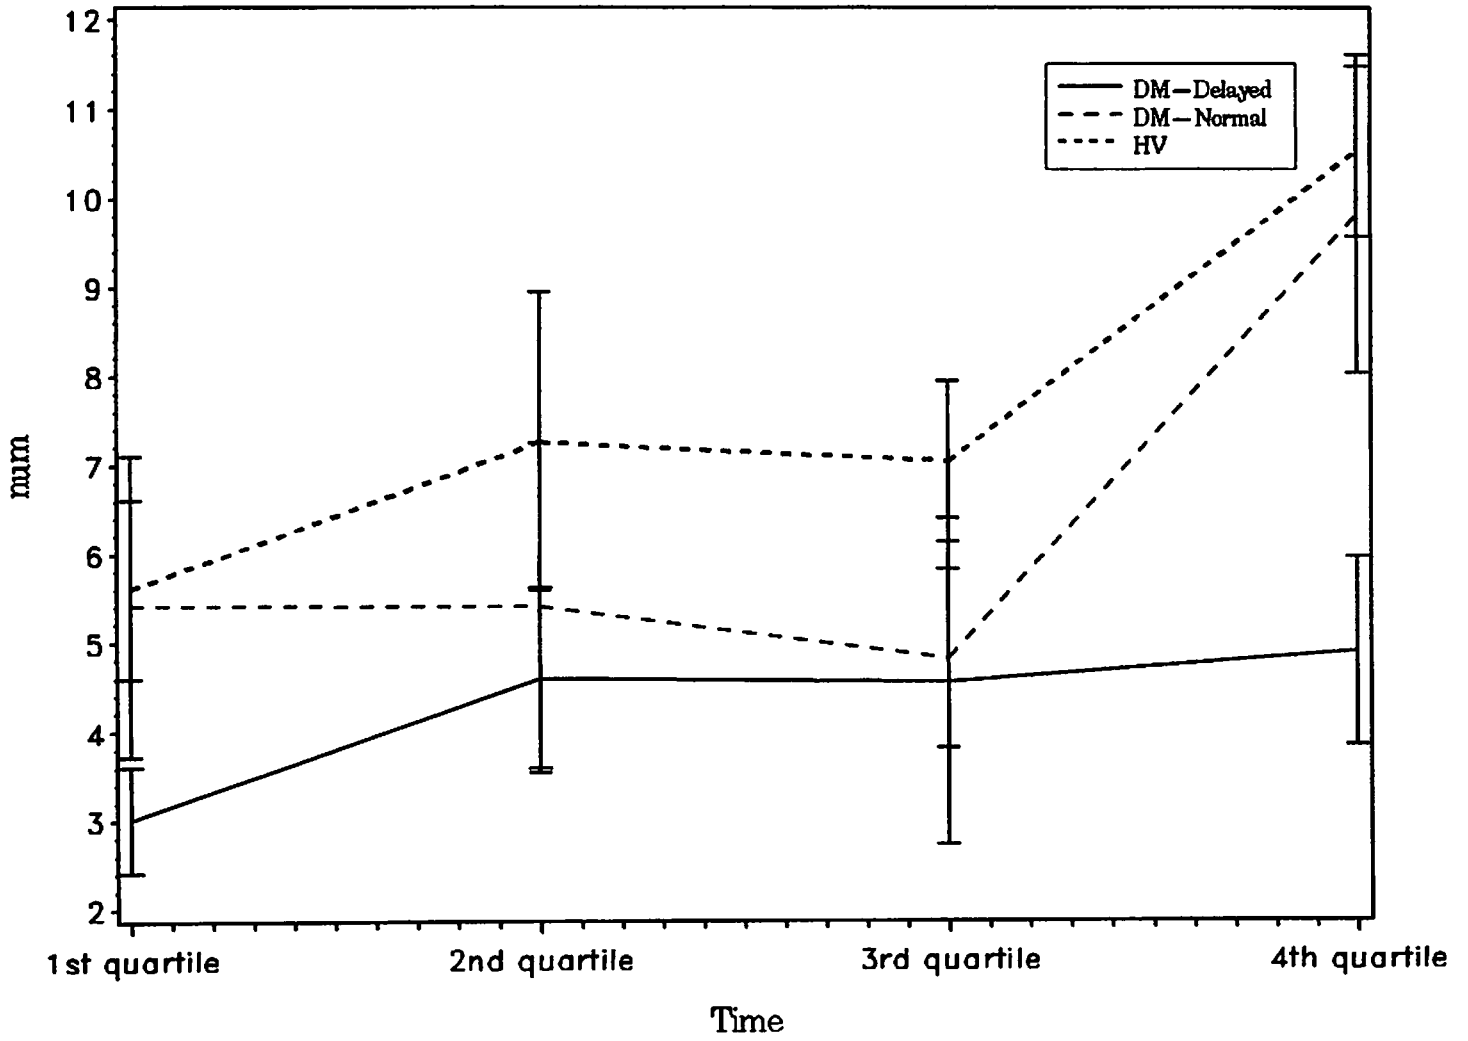



## Analysis of endpoint Qnum by GET quartile and group

**Overall, within time period, and within group tests based on fitted marginal model**

| Type 3 Tests of Fixed Effects |           |           |         |        |
|-------------------------------|-----------|-----------|---------|--------|
| Effect                        | Num<br>DF | Den<br>DF | F Value | Pr > F |
| Group                         | 2         | 58        | 2.85    | 0.0657 |
| time                          | 3         | 58        | 9.32    | <.0001 |
| Group*time                    | 6         | 58        | 0.84    | 0.5421 |

  

| Group      | Group     | Estimate | P-value |
|------------|-----------|----------|---------|
| DM-Delayed | DM-Normal | -0.3250  | 0.1716  |
| DM-Delayed | HV        | -0.4033  | 0.0202  |
| DM-Normal  | HV        | -0.07825 | 0.6954  |

  

| Time         | Group      | Group     | Estimate | P-value |
|--------------|------------|-----------|----------|---------|
| 1st quartile | DM-Delayed | DM-Normal | -0.3825  | 0.2610  |
| 1st quartile | DM-Delayed | HV        | -0.3092  | 0.2071  |
| 1st quartile | DM-Normal  | HV        | 0.07334  | 0.7981  |
| 2nd quartile | DM-Delayed | DM-Normal | -0.00590 | 0.9880  |
| 2nd quartile | DM-Delayed | HV        | -0.1230  | 0.6642  |
| 2nd quartile | DM-Normal  | HV        | -0.1170  | 0.7256  |
| 3rd quartile | DM-Delayed | DM-Normal | -0.2750  | 0.4196  |
| 3rd quartile | DM-Delayed | HV        | -0.4872  | 0.0498  |
| 3rd quartile | DM-Normal  | HV        | -0.2122  | 0.4617  |
| 4th quartile | DM-Delayed | DM-Normal | -0.6367  | 0.0204  |
| 4th quartile | DM-Delayed | HV        | -0.6937  | 0.0006  |
| 4th quartile | DM-Normal  | HV        | -0.05705 | 0.8017  |

  

| Group      | Time         | Time         | Estimate | P-value |
|------------|--------------|--------------|----------|---------|
| DM-Delayed | 1st quartile | 2nd quartile | -0.2638  | 0.2965  |
| DM-Delayed | 1st quartile | 3rd quartile | -0.09063 | 0.7509  |
| DM-Delayed | 1st quartile | 4th quartile | -0.3443  | 0.1390  |
| DM-Delayed | 2nd quartile | 3rd quartile | 0.1732   | 0.4982  |
| DM-Delayed | 2nd quartile | 4th quartile | -0.08051 | 0.7535  |
| DM-Delayed | 3rd quartile | 4th quartile | -0.2537  | 0.2413  |

## Analysis of endpoint Qnum by GET quartile and group

Overall, within time period, and within group tests based on fitted marginal model

| Group     | Time         | Time         | Estimate | P-value |
|-----------|--------------|--------------|----------|---------|
| DM-Normal | 1st quartile | 2nd quartile | 0.1128   | 0.7143  |
| DM-Normal | 1st quartile | 3rd quartile | 0.01690  | 0.9614  |
| DM-Normal | 1st quartile | 4th quartile | -0.5985  | 0.0375  |
| DM-Normal | 2nd quartile | 3rd quartile | -0.09592 | 0.7590  |
| DM-Normal | 2nd quartile | 4th quartile | -0.7113  | 0.0266  |
| DM-Normal | 3rd quartile | 4th quartile | -0.6154  | 0.0225  |
| HV        | 1st quartile | 2nd quartile | -0.07757 | 0.5691  |
| HV        | 1st quartile | 3rd quartile | -0.2687  | 0.0857  |
| HV        | 1st quartile | 4th quartile | -0.7289  | <.0001  |
| HV        | 2nd quartile | 3rd quartile | -0.1911  | 0.1697  |
| HV        | 2nd quartile | 4th quartile | -0.6513  | <.0001  |
| HV        | 3rd quartile | 4th quartile | -0.4602  | 0.0002  |

**Analysis of endpoint Qnum by GET quartile and group  
Adjusted for sex and age  
Overall, within time period, and within group tests based on fitted marginal model**

| Type 3 Tests of Fixed Effects |           |           |         |        |
|-------------------------------|-----------|-----------|---------|--------|
| Effect                        | Num<br>DF | Den<br>DF | F Value | Pr > F |
| Group                         | 2         | 56        | 2.69    | 0.0770 |
| time                          | 3         | 56        | 9.32    | <.0001 |
| Group*time                    | 6         | 56        | 0.84    | 0.5423 |
| Sex                           | 1         | 56        | 0.27    | 0.6023 |
| Age                           | 1         | 56        | 0.48    | 0.4917 |

| Group      | Group     | Estimate | P-value |
|------------|-----------|----------|---------|
| DM-Delayed | DM-Normal | -0.2909  | 0.2463  |
| DM-Delayed | HV        | -0.4203  | 0.0253  |
| DM-Normal  | HV        | -0.1294  | 0.5988  |

| Time         | Group      | Group     | Estimate | P-value |
|--------------|------------|-----------|----------|---------|
| 1st quartile | DM-Delayed | DM-Normal | -0.3484  | 0.3215  |
| 1st quartile | DM-Delayed | HV        | -0.3262  | 0.2037  |
| 1st quartile | DM-Normal  | HV        | 0.02218  | 0.9451  |
| 2nd quartile | DM-Delayed | DM-Normal | 0.02821  | 0.9439  |
| 2nd quartile | DM-Delayed | HV        | -0.1400  | 0.6310  |
| 2nd quartile | DM-Normal  | HV        | -0.1682  | 0.6426  |
| 3rd quartile | DM-Delayed | DM-Normal | -0.2409  | 0.4903  |
| 3rd quartile | DM-Delayed | HV        | -0.5043  | 0.0508  |
| 3rd quartile | DM-Normal  | HV        | -0.2634  | 0.4128  |
| 4th quartile | DM-Delayed | DM-Normal | -0.6026  | 0.0350  |
| 4th quartile | DM-Delayed | HV        | -0.7108  | 0.0010  |
| 4th quartile | DM-Normal  | HV        | -0.1082  | 0.6870  |

**Analysis of endpoint Qnum by GET quartile and group  
Adjusted for sex and age**

**Overall, within time period, and within group tests based on fitted marginal model**

| Group      | Time         | Time         | Estimate | P-value |
|------------|--------------|--------------|----------|---------|
| DM-Delayed | 1st quartile | 2nd quartile | -0.2638  | 0.2966  |
| DM-Delayed | 1st quartile | 3rd quartile | -0.09063 | 0.7509  |
| DM-Delayed | 1st quartile | 4th quartile | -0.3443  | 0.1392  |
| DM-Delayed | 2nd quartile | 3rd quartile | 0.1732   | 0.4983  |
| DM-Delayed | 2nd quartile | 4th quartile | -0.08051 | 0.7536  |
| DM-Delayed | 3rd quartile | 4th quartile | -0.2537  | 0.2415  |
| DM-Normal  | 1st quartile | 2nd quartile | 0.1128   | 0.7143  |
| DM-Normal  | 1st quartile | 3rd quartile | 0.01690  | 0.9614  |
| DM-Normal  | 1st quartile | 4th quartile | -0.5985  | 0.0376  |
| DM-Normal  | 2nd quartile | 3rd quartile | -0.09592 | 0.7590  |
| DM-Normal  | 2nd quartile | 4th quartile | -0.7113  | 0.0267  |
| DM-Normal  | 3rd quartile | 4th quartile | -0.6154  | 0.0226  |
| HV         | 1st quartile | 2nd quartile | -0.07757 | 0.5692  |
| HV         | 1st quartile | 3rd quartile | -0.2687  | 0.0859  |
| HV         | 1st quartile | 4th quartile | -0.7289  | <.0001  |
| HV         | 2nd quartile | 3rd quartile | -0.1911  | 0.1699  |
| HV         | 2nd quartile | 4th quartile | -0.6513  | <.0001  |
| HV         | 3rd quartile | 4th quartile | -0.4602  | 0.0002  |

**Analysis of endpoint Qnum by GET quartile and group  
Adjusted for sex, age, and bmi  
Overall, within time period, and within group tests based on fitted marginal model**

| Type 3 Tests of Fixed Effects |           |           |         |        |
|-------------------------------|-----------|-----------|---------|--------|
| Effect                        | Num<br>DF | Den<br>DF | F Value | Pr > F |
| Group                         | 2         | 55        | 4.16    | 0.0208 |
| time                          | 3         | 55        | 9.32    | <.0001 |
| Group*time                    | 6         | 55        | 0.84    | 0.5424 |
| Sex                           | 1         | 55        | 0.00    | 0.9936 |
| Age                           | 1         | 55        | 0.18    | 0.6724 |
| BMI                           | 1         | 55        | 7.75    | 0.0073 |

| Group      | Group     | Estimate | P-value |
|------------|-----------|----------|---------|
| DM-Delayed | DM-Normal | -0.2621  | 0.2606  |
| DM-Delayed | HV        | -0.4961  | 0.0056  |
| DM-Normal  | HV        | -0.2340  | 0.3163  |

| Time         | Group      | Group     | Estimate | P-value |
|--------------|------------|-----------|----------|---------|
| 1st quartile | DM-Delayed | DM-Normal | -0.3196  | 0.3457  |
| 1st quartile | DM-Delayed | HV        | -0.4020  | 0.1079  |
| 1st quartile | DM-Normal  | HV        | -0.08244 | 0.7916  |
| 2nd quartile | DM-Delayed | DM-Normal | 0.05700  | 0.8797  |
| 2nd quartile | DM-Delayed | HV        | -0.2158  | 0.4336  |
| 2nd quartile | DM-Normal  | HV        | -0.2728  | 0.4271  |
| 3rd quartile | DM-Delayed | DM-Normal | -0.2121  | 0.5312  |
| 3rd quartile | DM-Delayed | HV        | -0.5801  | 0.0221  |
| 3rd quartile | DM-Normal  | HV        | -0.3680  | 0.2416  |
| 4th quartile | DM-Delayed | DM-Normal | -0.5738  | 0.0449  |
| 4th quartile | DM-Delayed | HV        | -0.7866  | 0.0003  |
| 4th quartile | DM-Normal  | HV        | -0.2128  | 0.4293  |

**Analysis of endpoint Qnum by GET quartile and group  
Adjusted for sex, age, and bmi**

**Overall, within time period, and within group tests based on fitted marginal model**

| Group      | Time         | Time         | Estimate | P-value |
|------------|--------------|--------------|----------|---------|
| DM-Delayed | 1st quartile | 2nd quartile | -0.2638  | 0.2967  |
| DM-Delayed | 1st quartile | 3rd quartile | -0.09063 | 0.7509  |
| DM-Delayed | 1st quartile | 4th quartile | -0.3443  | 0.1393  |
| DM-Delayed | 2nd quartile | 3rd quartile | 0.1732   | 0.4984  |
| DM-Delayed | 2nd quartile | 4th quartile | -0.08051 | 0.7536  |
| DM-Delayed | 3rd quartile | 4th quartile | -0.2537  | 0.2416  |
| DM-Normal  | 1st quartile | 2nd quartile | 0.1128   | 0.7144  |
| DM-Normal  | 1st quartile | 3rd quartile | 0.01690  | 0.9614  |
| DM-Normal  | 1st quartile | 4th quartile | -0.5985  | 0.0377  |
| DM-Normal  | 2nd quartile | 3rd quartile | -0.09592 | 0.7590  |
| DM-Normal  | 2nd quartile | 4th quartile | -0.7113  | 0.0268  |
| DM-Normal  | 3rd quartile | 4th quartile | -0.6154  | 0.0227  |
| HV         | 1st quartile | 2nd quartile | -0.07757 | 0.5692  |
| HV         | 1st quartile | 3rd quartile | -0.2687  | 0.0860  |
| HV         | 1st quartile | 4th quartile | -0.7289  | <.0001  |
| HV         | 2nd quartile | 3rd quartile | -0.1911  | 0.1700  |
| HV         | 2nd quartile | 4th quartile | -0.6513  | <.0001  |
| HV         | 3rd quartile | 4th quartile | -0.4602  | 0.0002  |

**Analysis of endpoint Qnum by GET quartile and group - Diabetics only  
Adjusted for sex**

**Overall, within time period, and within group tests based on fitted marginal model**

**Type 3 Tests of Fixed Effects**

| Effect     | Num | Den | F Value | Pr > F |
|------------|-----|-----|---------|--------|
|            | DF  | DF  |         |        |
| Group      | 1   | 17  | 2.69    | 0.1196 |
| time       | 3   | 17  | 9.24    | 0.0007 |
| Group*time | 3   | 17  | 1.50    | 0.2495 |
| Sex        | 1   | 17  | 1.52    | 0.2346 |

| Group      | Group     | Estimate | P-value |
|------------|-----------|----------|---------|
| DM-Delayed | DM-Normal | -0.3932  | 0.1196  |

| Time         | Group      | Group     | Estimate | P-value |
|--------------|------------|-----------|----------|---------|
| 1st quartile | DM-Delayed | DM-Normal | -0.4507  | 0.1382  |
| 2nd quartile | DM-Delayed | DM-Normal | -0.07407 | 0.8355  |
| 3rd quartile | DM-Delayed | DM-Normal | -0.3431  | 0.3155  |
| 4th quartile | DM-Delayed | DM-Normal | -0.7049  | 0.0311  |

| Group      | Time         | Time         | Estimate | P-value |
|------------|--------------|--------------|----------|---------|
| DM-Delayed | 1st quartile | 2nd quartile | -0.2638  | 0.1825  |
| DM-Delayed | 1st quartile | 3rd quartile | -0.09063 | 0.7230  |
| DM-Delayed | 1st quartile | 4th quartile | -0.3443  | 0.0799  |
| DM-Delayed | 2nd quartile | 3rd quartile | 0.1732   | 0.5220  |
| DM-Delayed | 2nd quartile | 4th quartile | -0.08051 | 0.7401  |
| DM-Delayed | 3rd quartile | 4th quartile | -0.2537  | 0.1107  |
| DM-Normal  | 1st quartile | 2nd quartile | 0.1128   | 0.6336  |
| DM-Normal  | 1st quartile | 3rd quartile | 0.01690  | 0.9569  |
| DM-Normal  | 1st quartile | 4th quartile | -0.5985  | 0.0171  |
| DM-Normal  | 2nd quartile | 3rd quartile | -0.09592 | 0.7710  |
| DM-Normal  | 2nd quartile | 4th quartile | -0.7113  | 0.0264  |
| DM-Normal  | 3rd quartile | 4th quartile | -0.6154  | 0.0039  |

**Analysis of endpoint Qnum by GET quartile and group - Diabetics only  
Adjusted for age**

**Overall, within time period, and within group tests based on fitted marginal model**

| Type 3 Tests of Fixed Effects |           |           |         |        |
|-------------------------------|-----------|-----------|---------|--------|
| Effect                        | Num<br>DF | Den<br>DF | F Value | Pr > F |
| Group                         | 1         | 17        | 0.63    | 0.4375 |
| time                          | 3         | 17        | 9.24    | 0.0007 |
| Group*time                    | 3         | 17        | 1.50    | 0.2495 |
| Age                           | 1         | 17        | 0.46    | 0.5054 |

| Group      | Group     | Estimate | P-value |
|------------|-----------|----------|---------|
| DM-Delayed | DM-Normal | -0.2232  | 0.4375  |

| Time         | Group      | Group     | Estimate | P-value |
|--------------|------------|-----------|----------|---------|
| 1st quartile | DM-Delayed | DM-Normal | -0.2807  | 0.3961  |
| 2nd quartile | DM-Delayed | DM-Normal | 0.09593  | 0.8074  |
| 3rd quartile | DM-Delayed | DM-Normal | -0.1731  | 0.6442  |
| 4th quartile | DM-Delayed | DM-Normal | -0.5349  | 0.1131  |

| Group      | Time         | Time         | Estimate | P-value |
|------------|--------------|--------------|----------|---------|
| DM-Delayed | 1st quartile | 2nd quartile | -0.2638  | 0.1825  |
| DM-Delayed | 1st quartile | 3rd quartile | -0.09063 | 0.7230  |
| DM-Delayed | 1st quartile | 4th quartile | -0.3443  | 0.0799  |
| DM-Delayed | 2nd quartile | 3rd quartile | 0.1732   | 0.5220  |
| DM-Delayed | 2nd quartile | 4th quartile | -0.08051 | 0.7401  |
| DM-Delayed | 3rd quartile | 4th quartile | -0.2537  | 0.1107  |
| DM-Normal  | 1st quartile | 2nd quartile | 0.1128   | 0.6336  |
| DM-Normal  | 1st quartile | 3rd quartile | 0.01690  | 0.9569  |
| DM-Normal  | 1st quartile | 4th quartile | -0.5985  | 0.0171  |
| DM-Normal  | 2nd quartile | 3rd quartile | -0.09592 | 0.7710  |
| DM-Normal  | 2nd quartile | 4th quartile | -0.7113  | 0.0264  |
| DM-Normal  | 3rd quartile | 4th quartile | -0.6154  | 0.0039  |



**Analysis of endpoint Qnum by GET quartile and group - Diabetics only  
Adjusted for bmi**

**Overall, within time period, and within group tests based on fitted marginal model**

| Type 3 Tests of Fixed Effects |           |           |         |        |
|-------------------------------|-----------|-----------|---------|--------|
| Effect                        | Num<br>DF | Den<br>DF | F Value | Pr > F |
| Group                         | 1         | 17        | 1.71    | 0.2084 |
| time                          | 3         | 17        | 9.24    | 0.0007 |
| Group*time                    | 3         | 17        | 1.50    | 0.2495 |
| BMI                           | 1         | 17        | 1.10    | 0.3097 |

| Group      | Group     | Estimate | P-value |
|------------|-----------|----------|---------|
| DM-Delayed | DM-Normal | -0.3041  | 0.2084  |

| Time         | Group      | Group     | Estimate | P-value |
|--------------|------------|-----------|----------|---------|
| 1st quartile | DM-Delayed | DM-Normal | -0.3615  | 0.2229  |
| 2nd quartile | DM-Delayed | DM-Normal | 0.01506  | 0.9645  |
| 3rd quartile | DM-Delayed | DM-Normal | -0.2540  | 0.4687  |
| 4th quartile | DM-Delayed | DM-Normal | -0.6157  | 0.0476  |

| Group      | Time         | Time         | Estimate | P-value |
|------------|--------------|--------------|----------|---------|
| DM-Delayed | 1st quartile | 2nd quartile | -0.2638  | 0.1825  |
| DM-Delayed | 1st quartile | 3rd quartile | -0.09063 | 0.7230  |
| DM-Delayed | 1st quartile | 4th quartile | -0.3443  | 0.0799  |
| DM-Delayed | 2nd quartile | 3rd quartile | 0.1732   | 0.5220  |
| DM-Delayed | 2nd quartile | 4th quartile | -0.08051 | 0.7401  |
| DM-Delayed | 3rd quartile | 4th quartile | -0.2537  | 0.1107  |
| DM-Normal  | 1st quartile | 2nd quartile | 0.1128   | 0.6336  |
| DM-Normal  | 1st quartile | 3rd quartile | 0.01690  | 0.9569  |
| DM-Normal  | 1st quartile | 4th quartile | -0.5985  | 0.0171  |
| DM-Normal  | 2nd quartile | 3rd quartile | -0.09592 | 0.7710  |
| DM-Normal  | 2nd quartile | 4th quartile | -0.7113  | 0.0264  |
| DM-Normal  | 3rd quartile | 4th quartile | -0.6154  | 0.0039  |

**Analysis of endpoint Qnum by GET quartile and group - Diabetics only  
Adjusted for Glucose**

**Overall, within time period, and within group tests based on fitted marginal model**

| Type 3 Tests of Fixed Effects |           |           |         |        |
|-------------------------------|-----------|-----------|---------|--------|
| Effect                        | Num<br>DF | Den<br>DF | F Value | Pr > F |
| Group                         | 1         | 16        | 1.52    | 0.2356 |
| time                          | 3         | 16        | 9.28    | 0.0009 |
| Group*time                    | 3         | 16        | 1.31    | 0.3069 |
| glucose                       | 1         | 16        | 0.21    | 0.6498 |

| Group      | Group     | Estimate | P-value |
|------------|-----------|----------|---------|
| DM-Delayed | DM-Normal | -0.3153  | 0.2356  |

| Time         | Group      | Group     | Estimate | P-value |
|--------------|------------|-----------|----------|---------|
| 1st quartile | DM-Delayed | DM-Normal | -0.3779  | 0.2422  |
| 2nd quartile | DM-Delayed | DM-Normal | -0.1055  | 0.7791  |
| 3rd quartile | DM-Delayed | DM-Normal | -0.1761  | 0.6261  |
| 4th quartile | DM-Delayed | DM-Normal | -0.6015  | 0.0631  |

| Group      | Time         | Time         | Estimate | P-value |
|------------|--------------|--------------|----------|---------|
| DM-Delayed | 1st quartile | 2nd quartile | -0.2638  | 0.1786  |
| DM-Delayed | 1st quartile | 3rd quartile | -0.09063 | 0.7260  |
| DM-Delayed | 1st quartile | 4th quartile | -0.3443  | 0.0881  |
| DM-Delayed | 2nd quartile | 3rd quartile | 0.1732   | 0.5017  |
| DM-Delayed | 2nd quartile | 4th quartile | -0.08051 | 0.7367  |
| DM-Delayed | 3rd quartile | 4th quartile | -0.2537  | 0.1135  |
| DM-Normal  | 1st quartile | 2nd quartile | 0.008636 | 0.9724  |
| DM-Normal  | 1st quartile | 3rd quartile | 0.1112   | 0.7425  |
| DM-Normal  | 1st quartile | 4th quartile | -0.5679  | 0.0360  |
| DM-Normal  | 2nd quartile | 3rd quartile | 0.1026   | 0.7599  |
| DM-Normal  | 2nd quartile | 4th quartile | -0.5766  | 0.0797  |
| DM-Normal  | 3rd quartile | 4th quartile | -0.6791  | 0.0035  |

**Analysis of endpoint Qnum by GET quartile and group - Diabetics only  
Adjusted for Insulin**

**Overall, within time period, and within group tests based on fitted marginal model**

| Type 3 Tests of Fixed Effects |           |           |         |        |
|-------------------------------|-----------|-----------|---------|--------|
| Effect                        | Num<br>DF | Den<br>DF | F Value | Pr > F |
| Group                         | 1         | 17        | 2.91    | 0.1064 |
| time                          | 3         | 17        | 9.24    | 0.0007 |
| Group*time                    | 3         | 17        | 1.50    | 0.2495 |
| Insulin                       | 1         | 17        | 2.00    | 0.1750 |

| Group      | Group     | Estimate | P-value |
|------------|-----------|----------|---------|
| DM-Delayed | DM-Normal | -0.4095  | 0.1064  |

| Time         | Group      | Group     | Estimate | P-value |
|--------------|------------|-----------|----------|---------|
| 1st quartile | DM-Delayed | DM-Normal | -0.4669  | 0.1069  |
| 2nd quartile | DM-Delayed | DM-Normal | -0.09034 | 0.7982  |
| 3rd quartile | DM-Delayed | DM-Normal | -0.3594  | 0.3326  |
| 4th quartile | DM-Delayed | DM-Normal | -0.7211  | 0.0219  |

| Group      | Time         | Time         | Estimate | P-value |
|------------|--------------|--------------|----------|---------|
| DM-Delayed | 1st quartile | 2nd quartile | -0.2638  | 0.1825  |
| DM-Delayed | 1st quartile | 3rd quartile | -0.09063 | 0.7230  |
| DM-Delayed | 1st quartile | 4th quartile | -0.3443  | 0.0799  |
| DM-Delayed | 2nd quartile | 3rd quartile | 0.1732   | 0.5220  |
| DM-Delayed | 2nd quartile | 4th quartile | -0.08051 | 0.7401  |
| DM-Delayed | 3rd quartile | 4th quartile | -0.2537  | 0.1107  |
| DM-Normal  | 1st quartile | 2nd quartile | 0.1128   | 0.6336  |
| DM-Normal  | 1st quartile | 3rd quartile | 0.01690  | 0.9569  |
| DM-Normal  | 1st quartile | 4th quartile | -0.5985  | 0.0171  |
| DM-Normal  | 2nd quartile | 3rd quartile | -0.09592 | 0.7710  |
| DM-Normal  | 2nd quartile | 4th quartile | -0.7113  | 0.0264  |
| DM-Normal  | 3rd quartile | 4th quartile | -0.6154  | 0.0039  |

**Analysis of endpoint Qnum by GET quartile and group - Diabetics only  
Adjusted for Oral\_hypo**

**Overall, within time period, and within group tests based on fitted marginal model**

**Type 3 Tests of Fixed Effects**

| Effect     | Num<br>DF | Den<br>DF | F Value | Pr > F |
|------------|-----------|-----------|---------|--------|
| Group      | 1         | 17        | 1.80    | 0.1969 |
| time       | 3         | 17        | 9.24    | 0.0007 |
| Group*time | 3         | 17        | 1.50    | 0.2495 |
| Oral_hypo  | 1         | 17        | 0.00    | 0.9807 |

| Group      | Group     | Estimate | P-value |
|------------|-----------|----------|---------|
| DM-Delayed | DM-Normal | -0.3244  | 0.1969  |

| Time         | Group      | Group     | Estimate | P-value |
|--------------|------------|-----------|----------|---------|
| 1st quartile | DM-Delayed | DM-Normal | -0.3819  | 0.1975  |
| 2nd quartile | DM-Delayed | DM-Normal | -0.00531 | 0.9882  |
| 3rd quartile | DM-Delayed | DM-Normal | -0.2744  | 0.4385  |
| 4th quartile | DM-Delayed | DM-Normal | -0.6361  | 0.0425  |

| Group      | Time         | Time         | Estimate | P-value |
|------------|--------------|--------------|----------|---------|
| DM-Delayed | 1st quartile | 2nd quartile | -0.2638  | 0.1825  |
| DM-Delayed | 1st quartile | 3rd quartile | -0.09063 | 0.7230  |
| DM-Delayed | 1st quartile | 4th quartile | -0.3443  | 0.0799  |
| DM-Delayed | 2nd quartile | 3rd quartile | 0.1732   | 0.5220  |
| DM-Delayed | 2nd quartile | 4th quartile | -0.08051 | 0.7401  |
| DM-Delayed | 3rd quartile | 4th quartile | -0.2537  | 0.1107  |
| DM-Normal  | 1st quartile | 2nd quartile | 0.1128   | 0.6336  |
| DM-Normal  | 1st quartile | 3rd quartile | 0.01690  | 0.9569  |
| DM-Normal  | 1st quartile | 4th quartile | -0.5985  | 0.0171  |
| DM-Normal  | 2nd quartile | 3rd quartile | -0.09592 | 0.7710  |
| DM-Normal  | 2nd quartile | 4th quartile | -0.7113  | 0.0264  |
| DM-Normal  | 3rd quartile | 4th quartile | -0.6154  | 0.0039  |

**Analysis of endpoint Qnum by GET quartile and group - Diabetics only  
Adjusted for Antidep**

**Overall, within time period, and within group tests based on fitted marginal model**

| Type 3 Tests of Fixed Effects |           |           |         |        |
|-------------------------------|-----------|-----------|---------|--------|
| Effect                        | Num<br>DF | Den<br>DF | F Value | Pr > F |
| Group                         | 1         | 17        | 1.98    | 0.1778 |
| time                          | 3         | 17        | 9.24    | 0.0007 |
| Group*time                    | 3         | 17        | 1.50    | 0.2495 |
| Antidep                       | 1         | 17        | 0.38    | 0.5440 |

| Group      | Group     | Estimate | P-value |
|------------|-----------|----------|---------|
| DM-Delayed | DM-Normal | -0.3379  | 0.1778  |

| Time         | Group      | Group     | Estimate | P-value |
|--------------|------------|-----------|----------|---------|
| 1st quartile | DM-Delayed | DM-Normal | -0.3954  | 0.1715  |
| 2nd quartile | DM-Delayed | DM-Normal | -0.01883 | 0.9577  |
| 3rd quartile | DM-Delayed | DM-Normal | -0.2879  | 0.4236  |
| 4th quartile | DM-Delayed | DM-Normal | -0.6496  | 0.0407  |

| Group      | Time         | Time         | Estimate | P-value |
|------------|--------------|--------------|----------|---------|
| DM-Delayed | 1st quartile | 2nd quartile | -0.2638  | 0.1825  |
| DM-Delayed | 1st quartile | 3rd quartile | -0.09063 | 0.7230  |
| DM-Delayed | 1st quartile | 4th quartile | -0.3443  | 0.0799  |
| DM-Delayed | 2nd quartile | 3rd quartile | 0.1732   | 0.5220  |
| DM-Delayed | 2nd quartile | 4th quartile | -0.08051 | 0.7401  |
| DM-Delayed | 3rd quartile | 4th quartile | -0.2537  | 0.1107  |
| DM-Normal  | 1st quartile | 2nd quartile | 0.1128   | 0.6336  |
| DM-Normal  | 1st quartile | 3rd quartile | 0.01690  | 0.9569  |
| DM-Normal  | 1st quartile | 4th quartile | -0.5985  | 0.0171  |
| DM-Normal  | 2nd quartile | 3rd quartile | -0.09592 | 0.7710  |
| DM-Normal  | 2nd quartile | 4th quartile | -0.7113  | 0.0264  |
| DM-Normal  | 3rd quartile | 4th quartile | -0.6154  | 0.0039  |

**Analysis of endpoint Lastnum by group  
Descriptive statistics by variable(s) group**

---

Analysis Variable : Lastnum Lastnum

| Group      | N   |    | Mean   | Std Dev | Std Error | Range  | Minimum | Maximum |
|------------|-----|----|--------|---------|-----------|--------|---------|---------|
|            | Obs | N  |        |         |           |        |         |         |
| DM-Delayed | 12  | 12 | 5.583  | 5.567   | 1.607     | 14.000 | 0.000   | 14.000  |
| DM-Normal  | 8   | 8  | 21.125 | 16.932  | 5.986     | 41.000 | 3.000   | 44.000  |
| HV         | 41  | 41 | 17.927 | 15.042  | 2.349     | 65.000 | 0.000   | 65.000  |

---



---

Analysis Variable : Lastnum Lastnum

| Group      | N<br>Obs | 5th Pctl | 10th Pctl | Lower    |        | Upper    |           |           |
|------------|----------|----------|-----------|----------|--------|----------|-----------|-----------|
|            |          |          |           | Quartile | Median | Quartile | 90th Pctl | 95th Pctl |
| DM-Delayed | 12       | 0.000    | 0.000     | 1.000    | 3.500  | 11.500   | 14.000    | 14.000    |
| DM-Normal  | 8        | 3.000    | 3.000     | 5.000    | 19.500 | 36.500   | 44.000    | 44.000    |
| HV         | 41       | 2.000    | 4.000     | 5.000    | 14.000 | 27.000   | 41.000    | 47.000    |

---

### Analysis of endpoint Lastnum by group

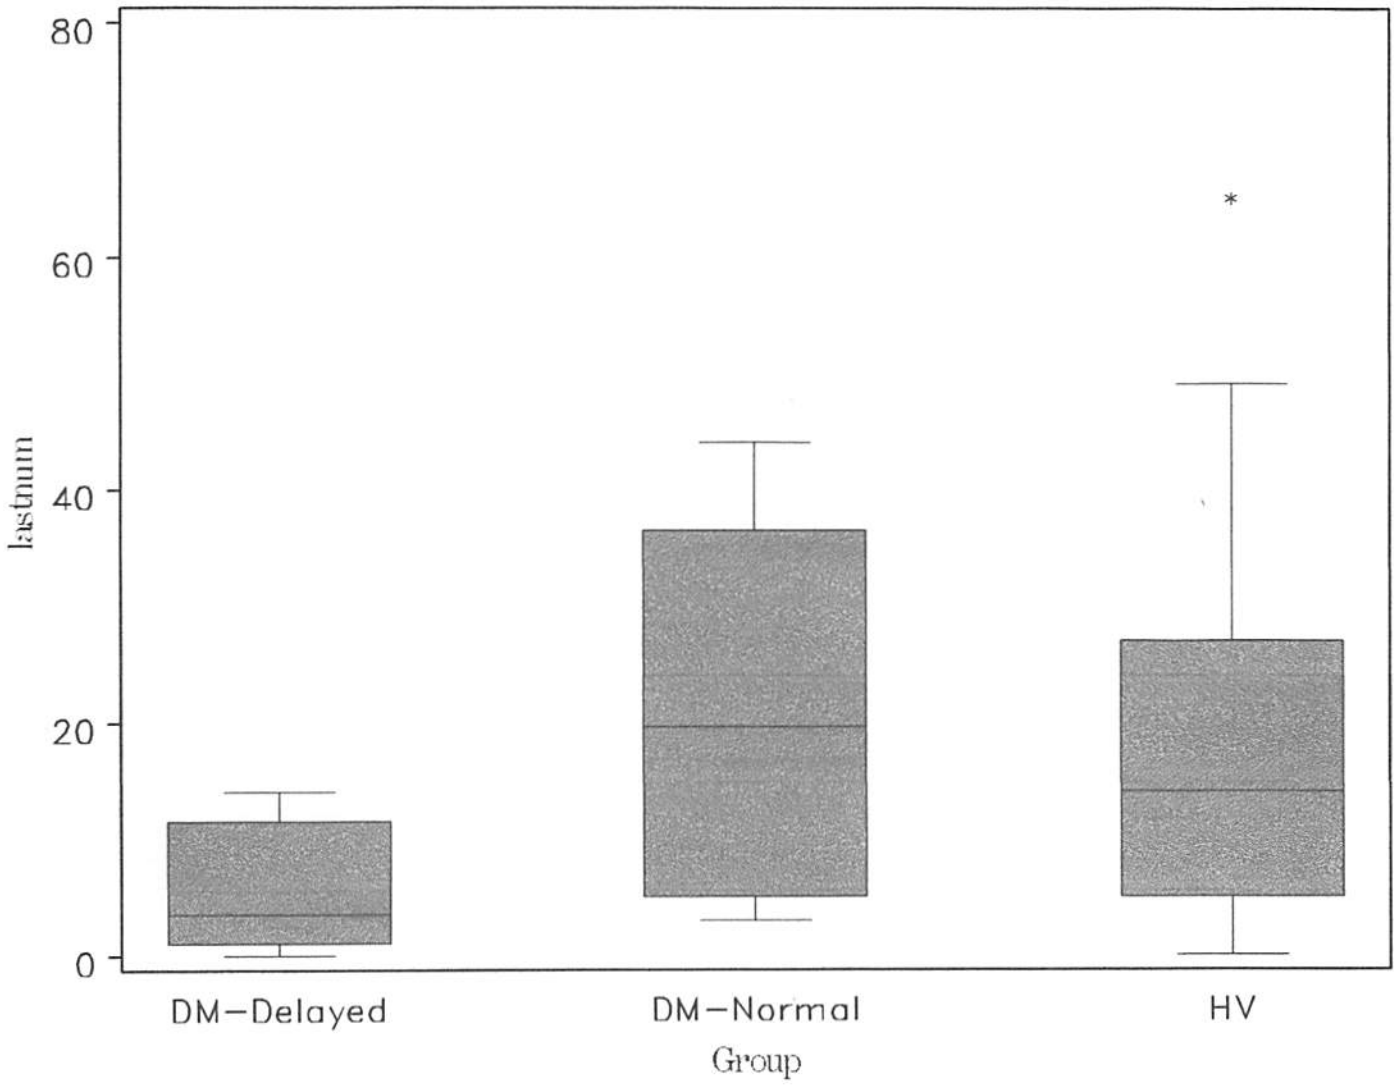

**Analysis of endpoint Lastnum by group**  
**Overall and between group tests based on fitted model**

---

Type 3 Tests of Fixed Effects

| Effect | Num Den |    | F Value | Pr > F |
|--------|---------|----|---------|--------|
|        | DF      | DF |         |        |
| Group  | 2       | 58 | 7.33    | 0.0014 |

---

| Group      | Group     | Estimate | P-value |
|------------|-----------|----------|---------|
| DM-Delayed | DM-Normal | -1.2578  | 0.0050  |
| DM-Delayed | HV        | -1.1414  | 0.0005  |
| DM-Normal  | HV        | 0.1165   | 0.7507  |

---



**Analysis of endpoint Lastnum by group  
Adjusted for sex and age  
Overall and between group tests based on fitted model**

---

Type 3 Tests of Fixed Effects

| Effect | Num | Den | F Value | Pr > F |
|--------|-----|-----|---------|--------|
|        | DF  | DF  |         |        |
| Group  | 2   | 56  | 7.49    | 0.0013 |
| Sex    | 1   | 56  | 1.81    | 0.1842 |
| Age    | 1   | 56  | 2.69    | 0.1065 |

---

| Group      | Group     | Estimate | P-value |
|------------|-----------|----------|---------|
| DM-Delayed | DM-Normal | -1.1101  | 0.0157  |
| DM-Delayed | HV        | -1.2100  | 0.0005  |
| DM-Normal  | HV        | -0.09986 | 0.8235  |

---

**Analysis of endpoint Lastnum by group  
Adjusted for sex, age, and bmi  
Overall and between group tests based on fitted model**

| Type 3 Tests of Fixed Effects |           |           |         |        |
|-------------------------------|-----------|-----------|---------|--------|
| Effect                        | Num<br>DF | Den<br>DF | F Value | Pr > F |
| Group                         | 2         | 55        | 7.00    | 0.0020 |
| Sex                           | 1         | 55        | 2.17    | 0.1464 |
| Age                           | 1         | 55        | 2.95    | 0.0917 |
| BMI                           | 1         | 55        | 0.65    | 0.4223 |

| Group      | Group     | Estimate | P-value |
|------------|-----------|----------|---------|
| DM-Delayed | DM-Normal | -1.1264  | 0.0148  |
| DM-Delayed | HV        | -1.1662  | 0.0010  |
| DM-Normal  | HV        | -0.03976 | 0.9304  |

**Analysis of endpoint Lastnum by group - Diabetics only  
Adjusted for sex  
Overall and between group tests based on fitted model**

| Type 3 Tests of Fixed Effects |           |           |         |        |
|-------------------------------|-----------|-----------|---------|--------|
| Effect                        | Num<br>DF | Den<br>DF | F Value | Pr > F |
| Group                         | 1         | 17        | 7.52    | 0.0139 |
| Sex                           | 1         | 17        | 0.59    | 0.4538 |

| Group      | Group     | Estimate | P-value |
|------------|-----------|----------|---------|
| DM-Delayed | DM-Normal | -1.3465  | 0.0139  |

**Analysis of endpoint Lastnum by group - Diabetics only  
Adjusted for age  
Overall and between group tests based on fitted model**

| Type 3 Tests of Fixed Effects |           |           |         |        |
|-------------------------------|-----------|-----------|---------|--------|
| Effect                        | Num<br>DF | Den<br>DF | F Value | Pr > F |
| Group                         | 1         | 17        | 2.26    | 0.1514 |
| Age                           | 1         | 17        | 2.30    | 0.1477 |

| Group      | Group     | Estimate | P-value |
|------------|-----------|----------|---------|
| DM-Delayed | DM-Normal | -0.8135  | 0.1514  |

**Analysis of endpoint Lastnum by group - Diabetics only  
Adjusted for bmi  
Overall and between group tests based on fitted model**

| Type 3 Tests of Fixed Effects |           |           |         |        |
|-------------------------------|-----------|-----------|---------|--------|
| Effect                        | Num<br>DF | Den<br>DF | F Value | Pr > F |
| Group                         | 1         | 17        | 7.22    | 0.0156 |
| BMI                           | 1         | 17        | 0.54    | 0.4714 |

| Group      | Group     | Estimate | P-value |
|------------|-----------|----------|---------|
| DM-Delayed | DM-Normal | -1.2885  | 0.0156  |

**Analysis of endpoint Lastnum by group - Diabetics only  
Adjusted for Glucose  
Overall and between group tests based on fitted model**

| Type 3 Tests of Fixed Effects |           |           |         |        |
|-------------------------------|-----------|-----------|---------|--------|
| Effect                        | Num<br>DF | Den<br>DF | F Value | Pr > F |
| Group                         | 1         | 16        | 5.04    | 0.0393 |
| glucose                       | 1         | 16        | 0.09    | 0.7669 |

| Group      | Group     | Estimate | P-value |
|------------|-----------|----------|---------|
| DM-Delayed | DM-Normal | -1.1420  | 0.0393  |

**Analysis of endpoint Lastnum by group - Diabetics only  
Adjusted for Insulin  
Overall and between group tests based on fitted model**

| Type 3 Tests of Fixed Effects |           |           |         |        |
|-------------------------------|-----------|-----------|---------|--------|
| Effect                        | Num<br>DF | Den<br>DF | F Value | Pr > F |
| Group                         | 1         | 17        | 7.01    | 0.0169 |
| Insulin                       | 1         | 17        | 0.24    | 0.6313 |

| Group      | Group     | Estimate | P-value |
|------------|-----------|----------|---------|
| DM-Delayed | DM-Normal | -1.3204  | 0.0169  |

**Analysis of endpoint Lastnum by group - Diabetics only  
Adjusted for Oral\_hypo  
Overall and between group tests based on fitted model**

**Type 3 Tests of Fixed Effects**

| Effect    | Num<br>DF | Den<br>DF | F Value | Pr > F |
|-----------|-----------|-----------|---------|--------|
| Group     | 1         | 17        | 6.47    | 0.0210 |
| Oral_hypo | 1         | 17        | 0.40    | 0.5373 |

| Group      | Group     | Estimate | P-value |
|------------|-----------|----------|---------|
| DM-Delayed | DM-Normal | -1.2268  | 0.0210  |



**Analysis of endpoint Lastnum by group - Diabetics only  
Adjusted for Antidep  
Overall and between group tests based on fitted model**

| Type 3 Tests of Fixed Effects |           |           |         |        |
|-------------------------------|-----------|-----------|---------|--------|
| Effect                        | Num<br>DF | Den<br>DF | F Value | Pr > F |
| Group                         | 1         | 17        | 6.76    | 0.0186 |
| Antidep                       | 1         | 17        | 1.96    | 0.1799 |

| Group      | Group     | Estimate | P-value |
|------------|-----------|----------|---------|
| DM-Delayed | DM-Normal | -1.2003  | 0.0186  |
